# Supplementary material for: A versatile luminescent metal–organic framework for selective detection of Fe(iii) cations and Cr(vi) anions
Source: Royal Society of Chemistry journal article supplement (doi:10.1039/d4ce01107d), 2025-01-01
Supplement: d4ce01107d1.pdf [file d4ce01107d1.pdf]

## *Supporting Information*

### **A Versatile Luminescent Metal-Organic Framework for Selective Detection of Fe(III) Cations and Cr(VI) Anions**

*Han Fang,<sup>a</sup> Jia-Peng Han,<sup>a</sup> Bo Zhang,<sup>a</sup> Deng-Bo Liu,<sup>a</sup> Xing-Wang Li,<sup>a</sup> Jing-Yu Li,<sup>a</sup> Yutong He,<sup>\*,b</sup> and Mei-Hui Yu<sup>\*,a</sup>*

*<sup>a</sup> School of Materials Science and Engineering, National Institute for Advanced Materials, Tianjin Key Laboratory of Metal and Molecule-Based Material Chemistry, Nankai University, Tianjin 300350, China*

*<sup>b</sup> School of Chemical Engineering and Technology, Tianjin University, Tianjin 300072, China*

\* Corresponding author.

E-mail: [heytt@tju.edu.cn](mailto:heytt@tju.edu.cn) (Y. He);

[mh@nankai.edu.cn](mailto:mh@nankai.edu.cn) (M.-H. Yu)

**Table S1.** Crystallographic data and structure refinement of **NKM-103**.

| <b>Identification code</b>             | <b>NKM-103</b>                                                                               |
|----------------------------------------|----------------------------------------------------------------------------------------------|
| Empirical formula                      | C <sub>43</sub> H <sub>24</sub> Cd <sub>2</sub> F <sub>4</sub> N <sub>6</sub> O <sub>8</sub> |
| Formula weight                         | 1053.48                                                                                      |
| Temperature/ K                         | 300.48(10)                                                                                   |
| Crystal system                         | Monoclinic                                                                                   |
| Space group                            | <i>C2/c</i>                                                                                  |
| <i>a</i> /Å                            | 26.9074(4)                                                                                   |
| <i>b</i> /Å                            | 17.1592(3)                                                                                   |
| <i>c</i> /Å                            | 27.3590(4)                                                                                   |
| <i>a</i> /°                            | 90                                                                                           |
| <i>b</i> /°                            | 96.1830(10)                                                                                  |
| <i>g</i> /°                            | 90                                                                                           |
| Unit cell volume/ Å <sup>3</sup>       | 12558.4(3)                                                                                   |
| <i>Z</i>                               | 8                                                                                            |
| Density (calculated)                   | 1.114 g/cm <sup>3</sup>                                                                      |
| F(000)                                 | 4160.0                                                                                       |
| Radiation                              | CuKα ( $\lambda = 1.54184$ )                                                                 |
| 2 $\theta$ range for data collection/° | 6.12 to 154.328                                                                              |
| Independent reflections                | 13062 [R(int) = 0.0587]                                                                      |
| Data/restraints/parameters             | 13062/0/568                                                                                  |
| Goodness-of-fit on F <sup>2</sup>      | 1.089                                                                                        |
| Final R indexes [I >= 2 $\sigma$ (I)]  | R <sub>1</sub> = 0.0393, wR <sub>2</sub> = 0.1106                                            |
| Final R indexes [all data]             | R <sub>1</sub> = 0.0425, wR <sub>2</sub> = 0.1132                                            |

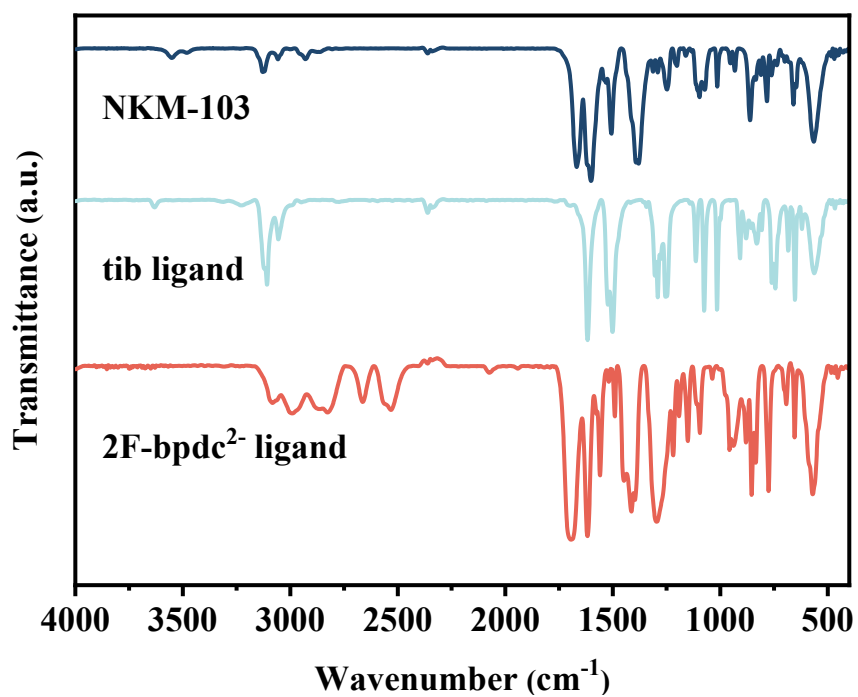

**Figure S1.** Fourier transform infrared spectra of the ligands and NKM-103.

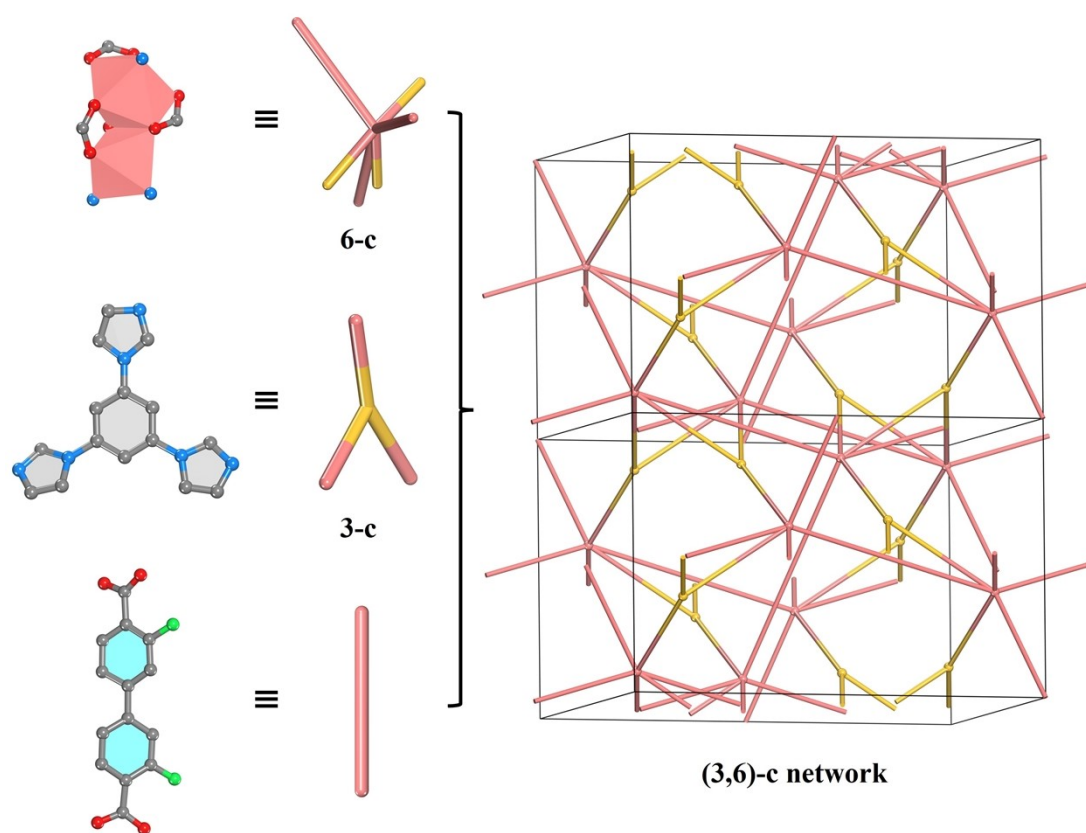

**Figure S2.** The schematic representative of the topology analysis for NKM-103.

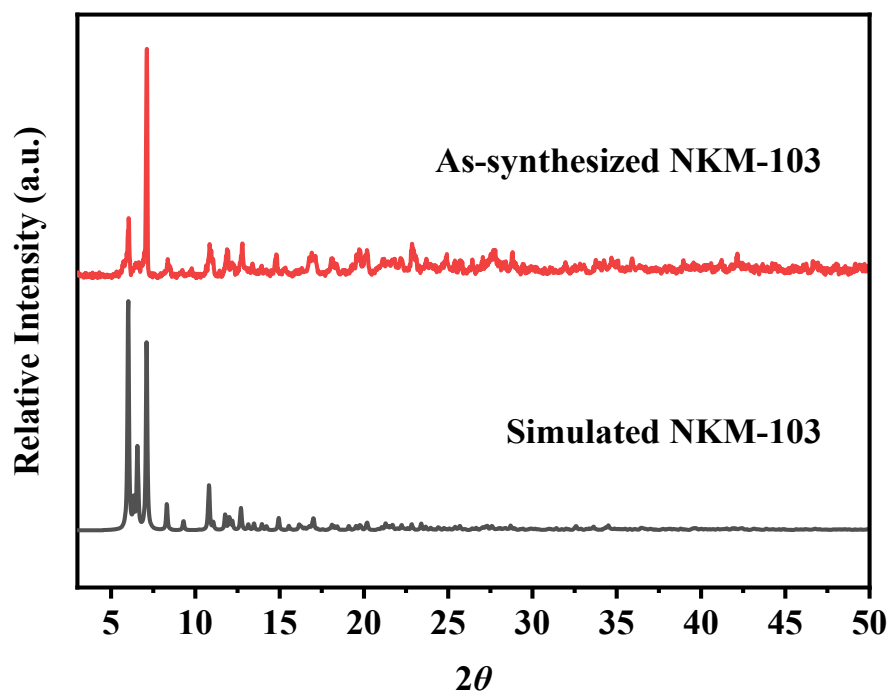

**Figure S3.** PXRD patterns of NKM-103 and the simulated one based on the crystal X-ray diffraction result.

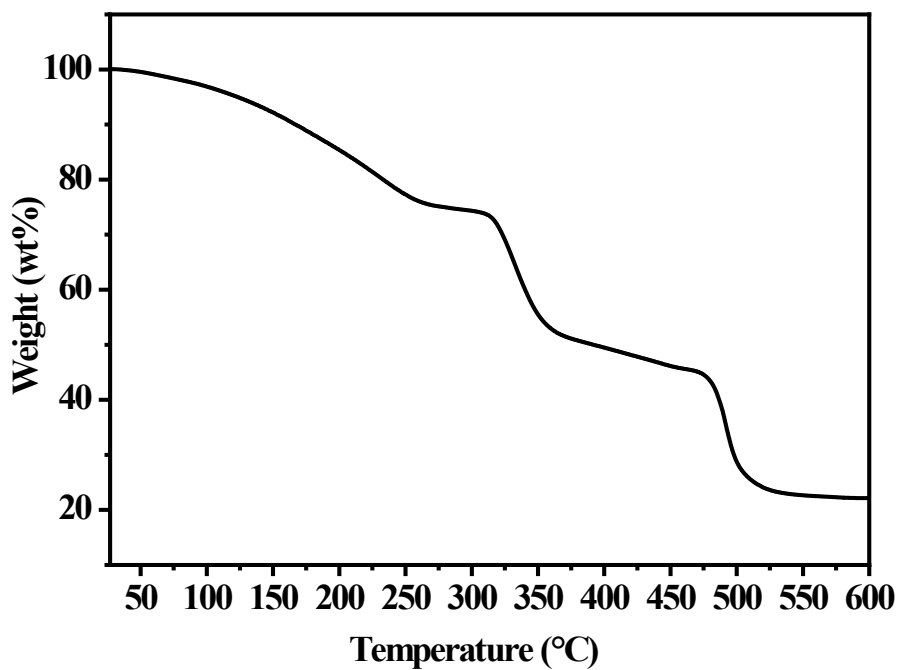

**Figure S4.** TGA curve of NKM-103.

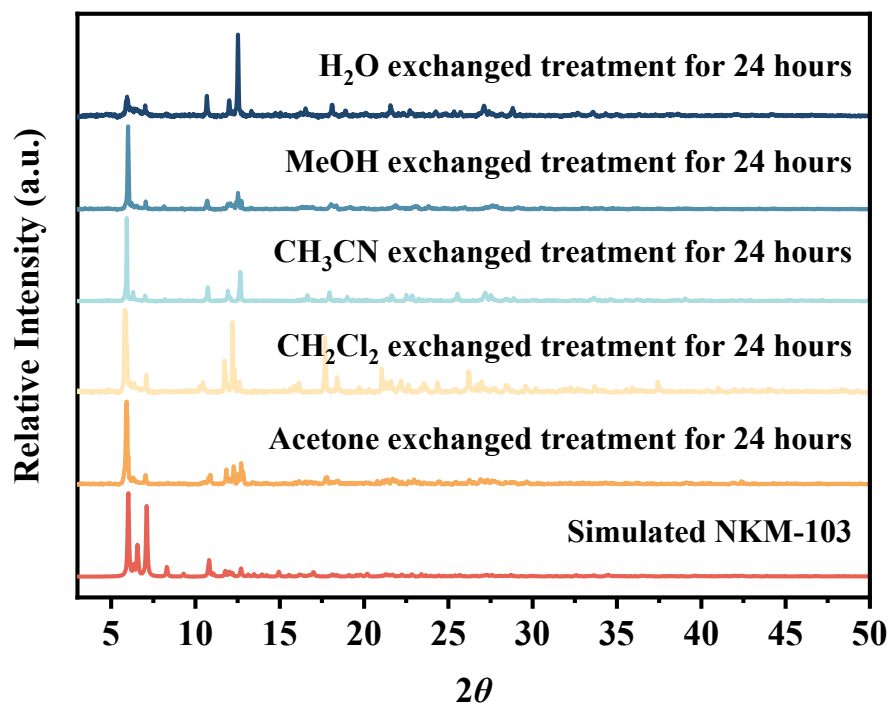

Figure S5. PXRD patterns of NKM-103 after different solvent exchanged treatment for 24 hours.

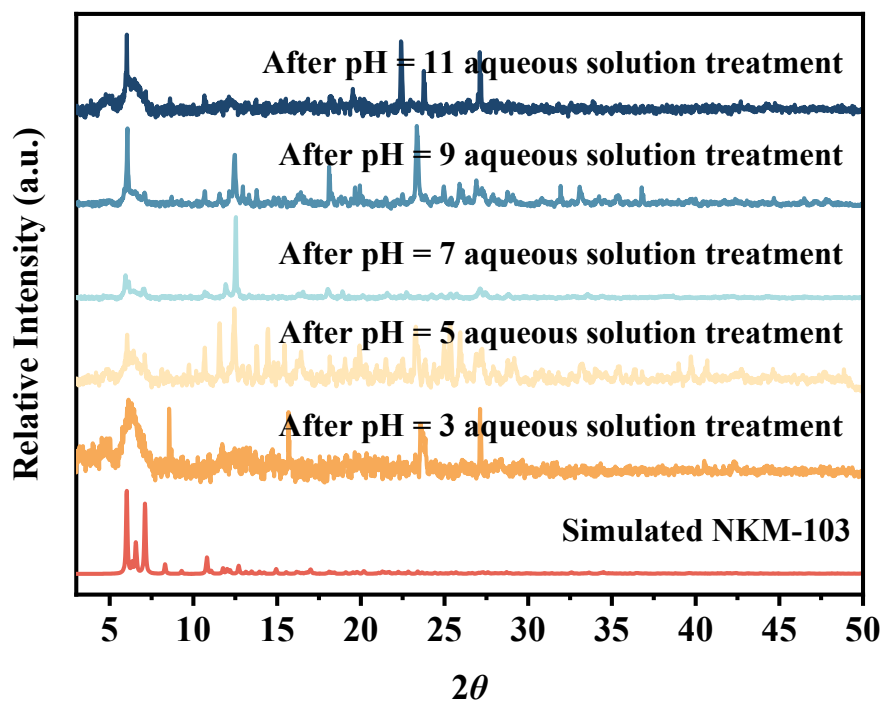

Figure S6. PXRD patterns of NKM-103 after different pH (3-11) aqueous solvent treatment for

24 hours.

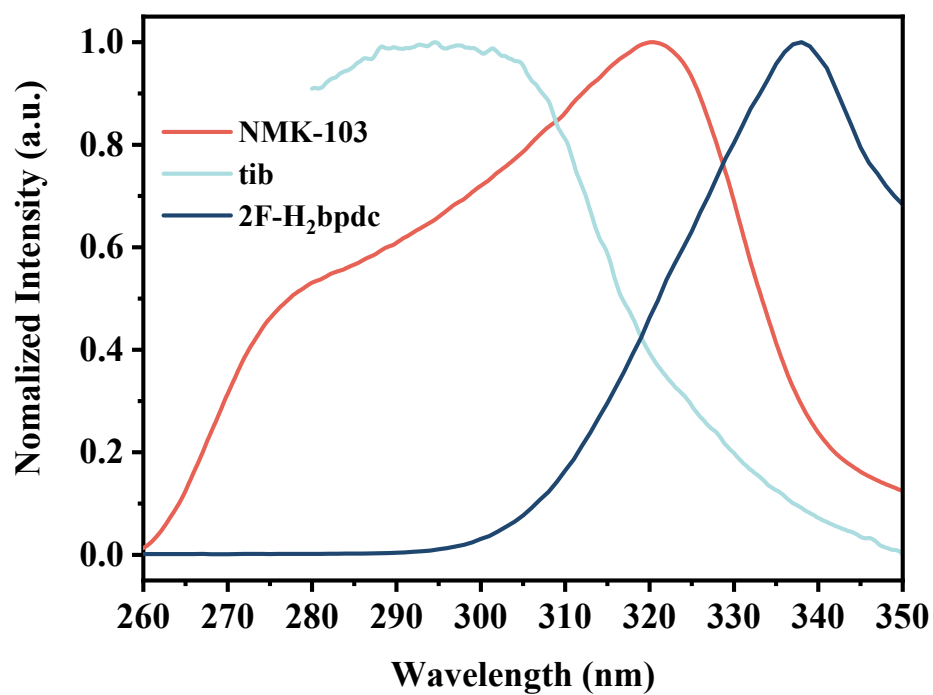

Figure S7. Normalized solid-state excitation spectra of NKM-103, tib and 2F-H<sub>2</sub>bpdC.

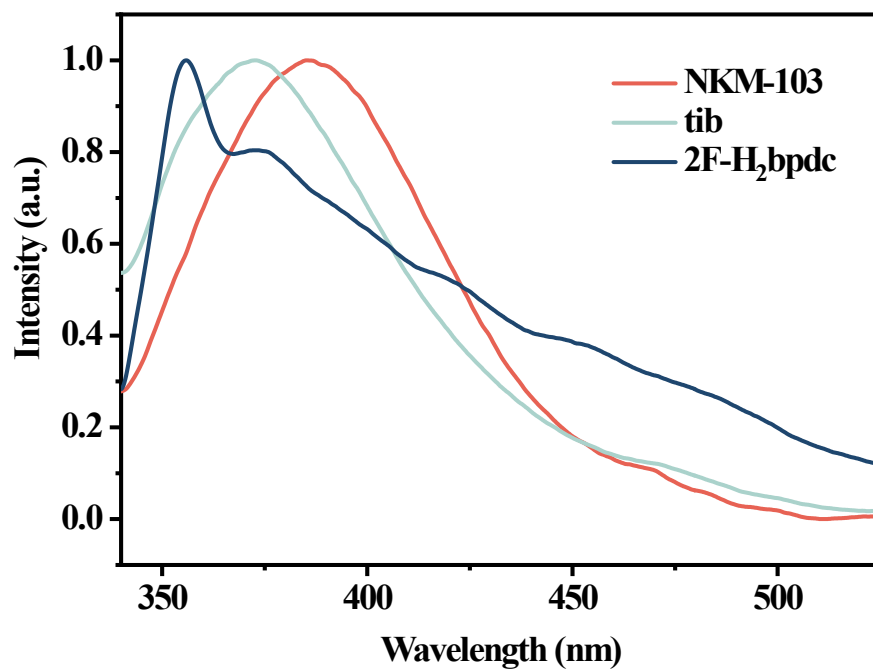

Figure S8. Normalized solid-state emission spectra of NKM-103, tib and 2F-H<sub>2</sub>bpdC.

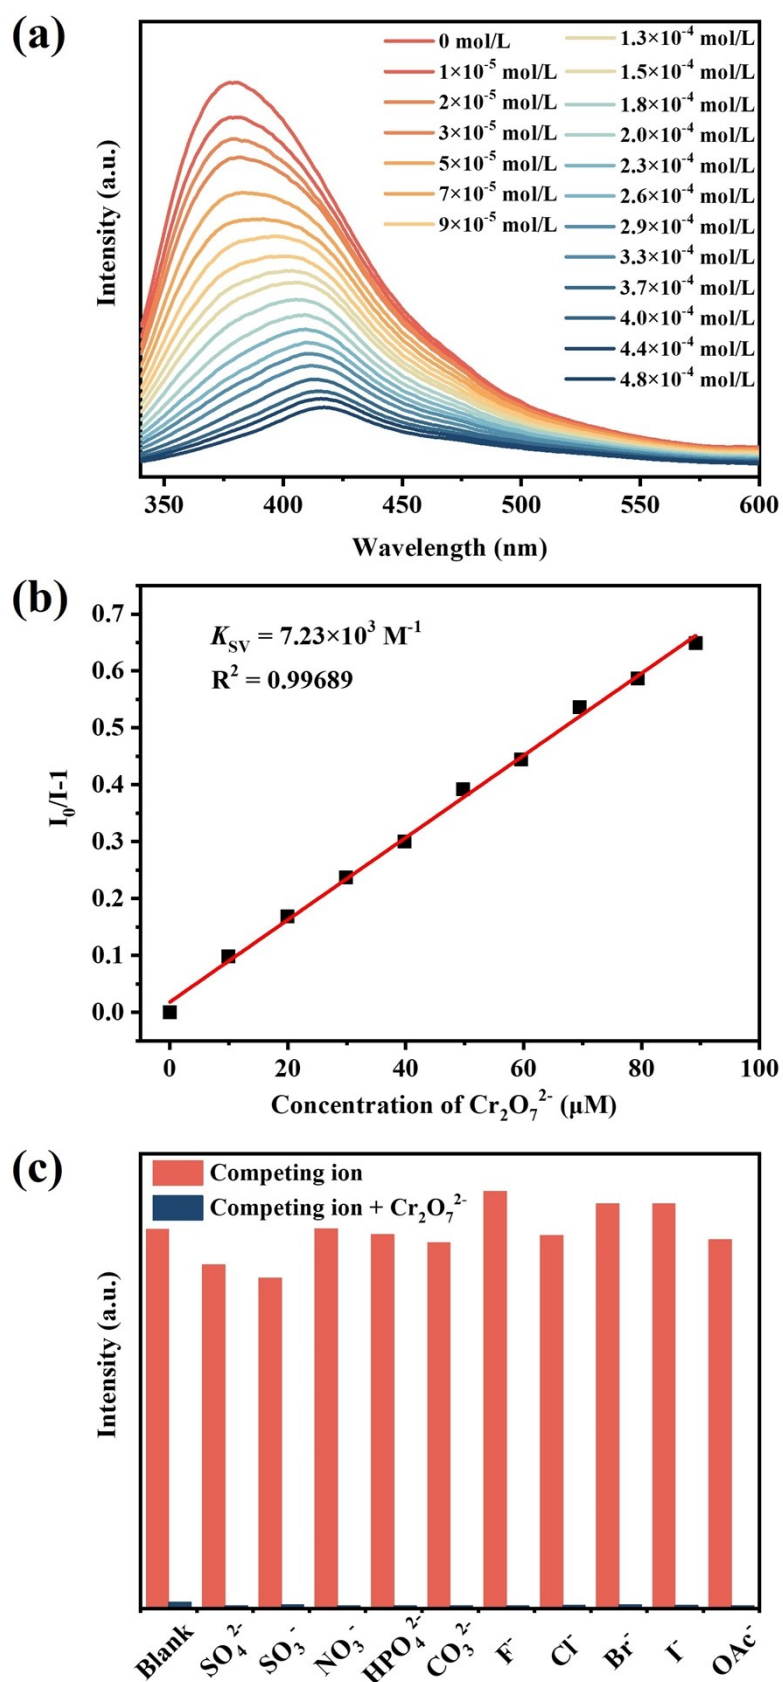

**Figure S9.** (a) Emission spectra of the NKM-103 at different  $\text{CrO}_4^{2-}$  concentrations (b) The Stern-Volmer curve  $I_0/I-1$  vs. the concentration of  $\text{CrO}_4^{2-}$ ; (c) Anti-jamming tests of NKM-103 with the

addition of coexisting ions and  $\text{CrO}_4^{2-}$ .

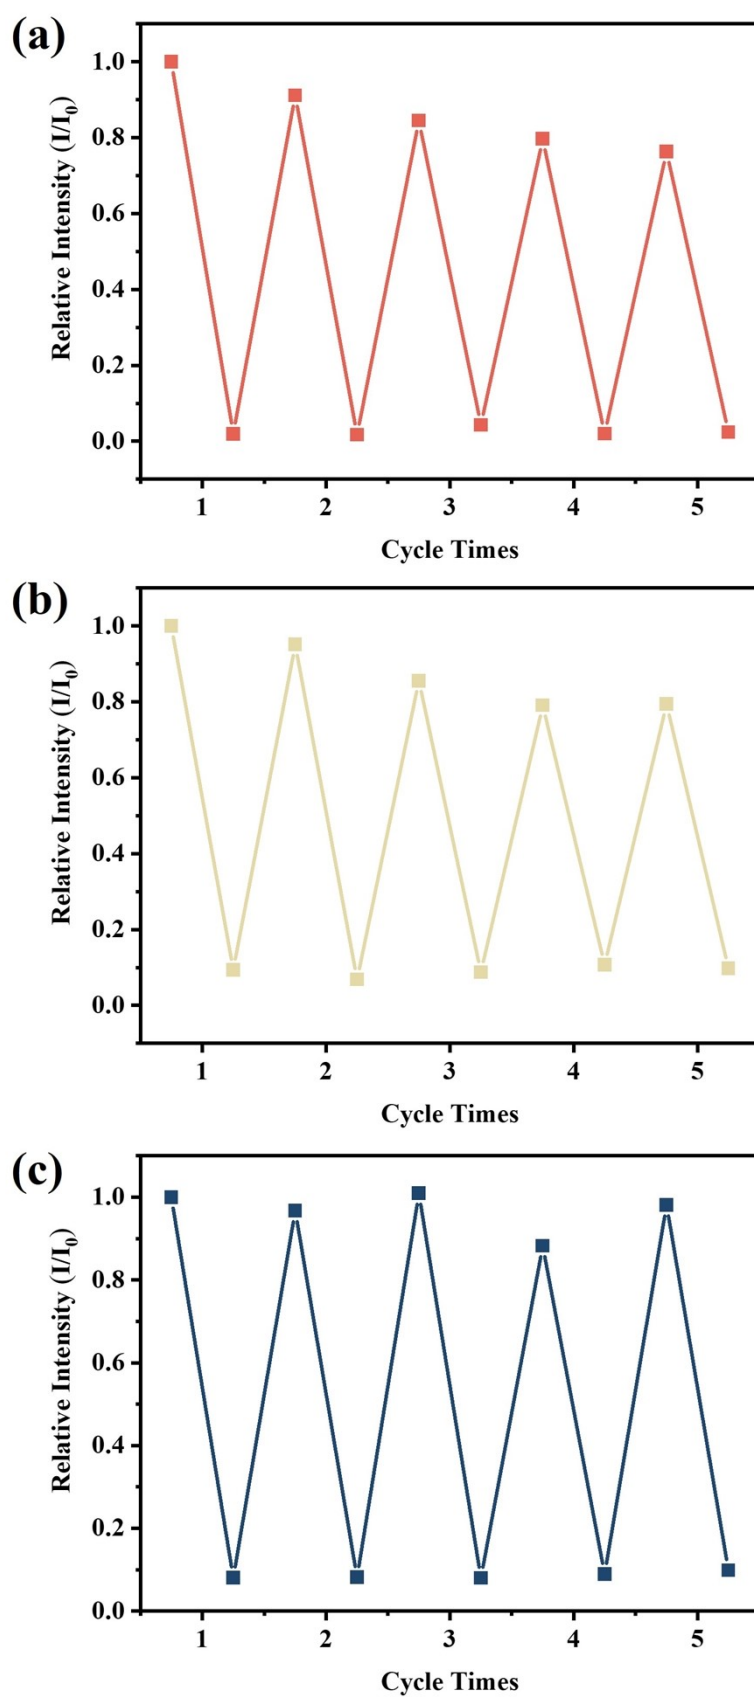

**Figure S10.** The relative fluorescence intensity in the cyclic tests of NKM-103 for sensing (a)  $\text{Fe}^{3+}$ ,



(b)  $\text{CrO}_4^{2-}$  and (c)  $\text{Cr}_2\text{O}_7^{2-}$ .

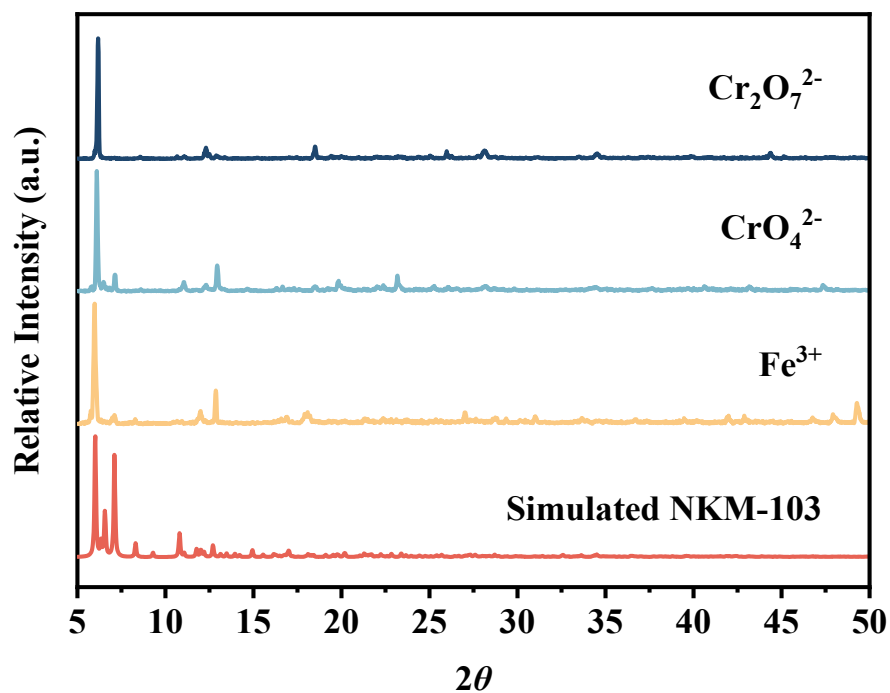

Figure S11. PXRD pattern of NKM-103 after five cyclic tests of  $\text{Fe}^{3+}$ ,  $\text{CrO}_4^{2-}$  and  $\text{Cr}_2\text{O}_7^{2-}$ .

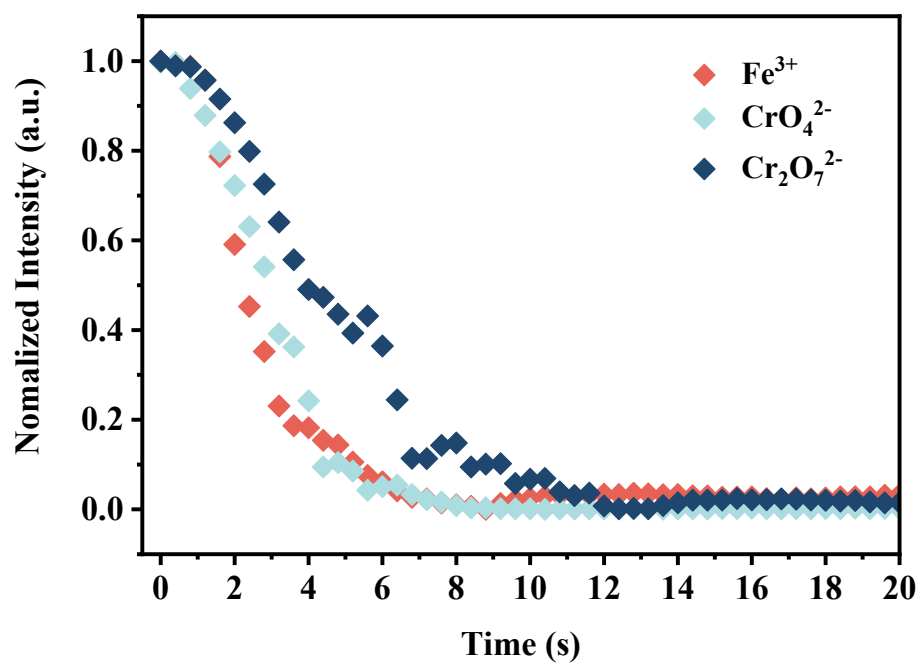

Figure S12. Time-resolved fluorescence decay curves of NKM-103 in the presence of  $\text{Fe}^{3+}$ ,  $\text{CrO}_4^{2-}$

and  $\text{Cr}_2\text{O}_7^{2-}$ , respectively.

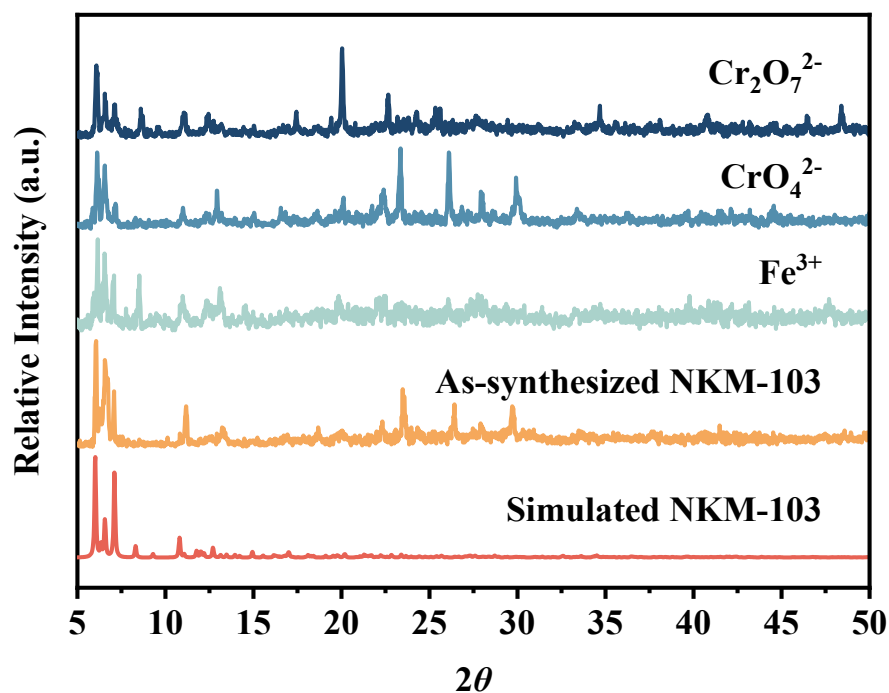

**Figure S13.** PXRD patterns of NKM-103 after immersion in the solutions containing  $\text{Fe}^{3+}$ ,  $\text{CrO}_4^{2-}$  and  $\text{Cr}_2\text{O}_7^{2-}$  for 10 h, with reference to the simulation result.

**Table S2.** Comparison of luminescent materials for  $\text{Fe}^{3+}$ .

| luminescent materials                                                                      | $K_{sv}$<br>( $\text{M}^{-1}$ ) | detection limit<br>(ppm) | Ref.      |
|--------------------------------------------------------------------------------------------|---------------------------------|--------------------------|-----------|
| <b>NKM-103</b>                                                                             | $6.67 \times 10^4$              | 7.06                     | This work |
| $\{[\text{Cd}(\text{L})(\text{SDBA})(\text{H}_2\text{O})] \cdot 0.5\text{H}_2\text{O}\}_n$ | $3.59 \times 10^4$              | 1.16                     | 1         |
| Cd-MOF                                                                                     | $1.2 \times 10^4$               | 28.71                    | 2         |
| $\{[\text{Zn}(\text{L})(\text{dcdps})]\}_n$                                                | $7.004 \times 10^3$             | 1.01                     | 3         |
| $\{\text{Zn}(\text{L})(\text{bdc})\}_n$                                                    | $9.066 \times 10^3$             | 7.21                     | 3         |
| $\{[\text{Cd}(\text{L})(\text{oba})] \cdot 0.5\text{DMF}\}_n$                              | $4.984 \times 10^3$             | 18.69                    | 3         |
| $\{[\text{Cd}(\text{L})(\text{bdc}) \cdot 2\text{H}_2\text{O}] \cdot 2\text{DMF}\}_n$      | $6.387 \times 10^3$             | 10.32                    | 3         |
| PAF-5CF                                                                                    | $1.187 \times 10^5$             | 6.16                     | 4         |
| $[(\text{CH}_3)_2\text{NH}_2][\text{Ca}(\text{Me}_2\text{tcpbH})(\text{H}_2\text{O})]$     | $1.18 \times 10^5$              | 3.38                     | 5         |

**Table S3.** Comparison of luminescent materials for  $\text{CrO}_4^{2-}$ .

| luminescent materials                           | $K_{sv}$<br>( $\text{M}^{-1}$ ) | detection limit<br>(ppm) | Ref.      |
|-------------------------------------------------|---------------------------------|--------------------------|-----------|
| <b>NKM-103</b>                                  | $5.25 \times 10^3$              | 79.15                    | This work |
| $[\text{Zn}_2(\text{ttz})\text{H}_2\text{O}]_n$ | $2.35 \times 10^3$              | 23.2                     | 6         |
| $[\text{Zn}(\text{btz})]_n$                     | $3.19 \times 10^3$              | 11.6                     | 6         |

|                                       |                    |       |   |
|---------------------------------------|--------------------|-------|---|
| Cd-MOF                                | $2.4 \times 10^3$  | 209.7 | 2 |
| $[\text{Zn}(\text{IPA})(\text{L})]_n$ | $1.00 \times 10^3$ | 21.3  | 7 |
| $[\text{Cd}(\text{IPA})(\text{L})]_n$ | $1.30 \times 10^3$ | 2.92  | 7 |

**Table S4.** Comparison of luminescent materials for  $\text{Cr}_2\text{O}_7^{2-}$ .

| luminescent materials                                                                                 | $K_{sv}$<br>( $\text{M}^{-1}$ ) | detection limit<br>(ppm) | Ref.      |
|-------------------------------------------------------------------------------------------------------|---------------------------------|--------------------------|-----------|
| <b>NKM-103</b>                                                                                        | $7.23 \times 10^3$              | 212.47                   | This work |
| Cd-MOF                                                                                                | $1.4 \times 10^4$               | 40.21                    | 2         |
| $\{[\text{Zn}_2(\text{Hbtc})_2(\text{BTD-bpy})(\text{MeOH})_2] \cdot \text{MeOH}\}_n$                 | $6.12 \times 10^3$              | 514.53                   | 8         |
| $\{[\text{Zn}_2(1,4\text{-ndc})_2(\text{BTD-bpy})] \cdot 0.5\text{MeOH} \cdot \text{H}_2\text{O}\}_n$ | $8.94 \times 10^3$              | 162.14                   | 8         |
| $\text{Zn}_2(\text{tpeb})(\text{bpdc})_2$                                                             | $1.12 \times 10^4$              | 224.84                   | 9         |
| $[\text{Zn}(\text{L})_2] \cdot 2\text{DMF}$                                                           | $1.25 \times 10^4$              | 313.48                   | 10        |
| $[\text{Zn}_2(\text{ttz})\text{H}_2\text{O}]_n$                                                       | $2.19 \times 10^3$              | 43.2                     | 6         |
| $[\text{Zn}(\text{btz})]_n$                                                                           | $4.23 \times 10^3$              | 4.32                     | 6         |
| $\{[\text{Cd}(\text{L})(\text{SDBA})(\text{H}_2\text{O})] \cdot 0.5\text{H}_2\text{O}\}_n$            | $4.97 \times 10^3$              | 105                      | 11        |

## References

- [1] S.-G. Chen, Z.-Z. Shi, L. Qin, H.-L. Jia and H.-G. Zheng, *Cryst. Growth Des.*, 2017, **17**, 67-72.
- [2] W. Cai, Y.-T. Yan, X.-D. Fan, H. Zhang, J.-L. Lu, Y.-L. Wu, J. Liu, W.-Y. Zhang and Y.-Y. Wang, *J. Mol. Struct.*, 2024, **1302**, 137528.
- [3] F.-Y. Ge, G.-H. Sun, L. Meng, S.-S. Ren and H.-G. Zheng, *Cryst. Growth Des.*, 2020, **20**, 1898-1904.
- [4] T. Ma, X. Zhao, Y. Matsuo, J. Song, R. Zhao, M. Faheem, M. Chen, Y. Zhang, Y. Tian and G. Zhu, *J. Mater. Chem. C.*, 2019, **7**, 2327-2332.
- [5] Z.-F. Wu, Z.-H. Fu, E. Velasco, K. Xing, H. Wang, G.-D. Zou, X.-Y. Huang and J. Li, *J. Mater. Chem. C*, 2020, **8**, 16784-16789.
- [6] C.-S. Cao, H.-C. Hu, H. Xu, W.-Z. Qiao and B. Zhao, *Cryst. Eng. Comm.*, 2016, **18**, 4445-4451.
- [7] P. Bhavesh, R. Yadagiri, K. B. Kamal, L. Ridhdhi, S. Eringathodi, *Inorg. Chem.*, 2017, **56**, 2627-2638.
- [8] Q. J. Jiang, J. Y. Lin, Z. J. Hu, V. K. S. Hsiao, M. Y. Chung and J. Y. Wu, *Cryst. Growth Des.*, 2021, **21**, 2056-2067.
- [9] B. B. Rath and J. J. Vittal, *Inorg. Chem.*, 2020, **59**, 8818-8826.
- [10] B. Li, Q. Q. Yan and G. P. Yong, *J. Mater. Chem. C*, 2020, **8**, 11786-11795.
- [11] S. Chen, Z. Shi, L. Qin, H. Jia and H. Zheng, *Cryst. Growth Des.*, 2016, **17**, 67-72.
